# Supplementary material for: Pamidronic acid-grafted nHA/PLGA hybrid nanofiber scaffolds suppress osteoclastic cell viability and enhance osteoblastic cell activity
Source: Royal Society of Chemistry journal article supplement (doi:10.1039/c6tb02083f), 2016-01-01
Supplement: c6tb02083f1.pdf [file c6tb02083f1.pdf]

### Supplementary data

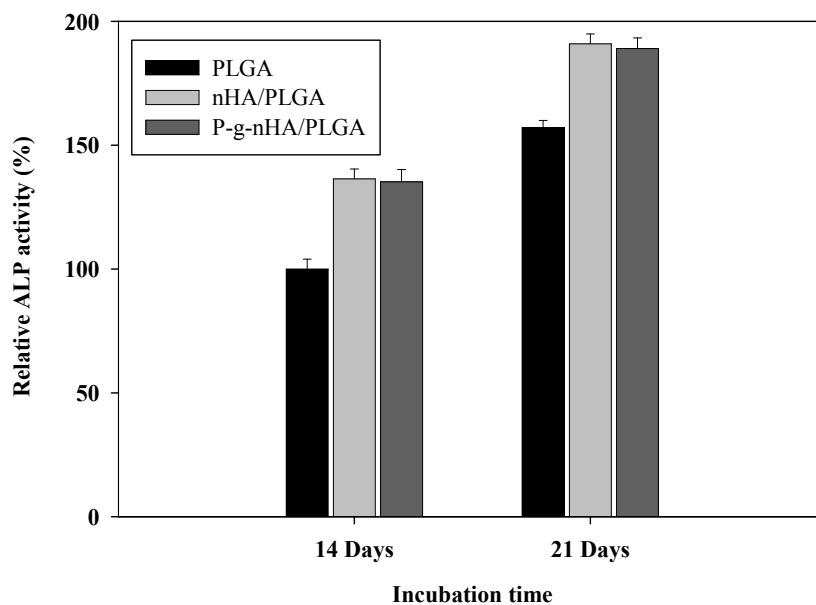

Relative ALP activity of osteoblastic cells cultured on electrospun nanofiber scaffolds for 14 and 21 days, respectively.
